# Supplementary material
Source: HighWire-hosted journal article supplement (https://jitc.bmj.com/content/7/1/151)
Supplement: media-11 [file media-11.pdf]

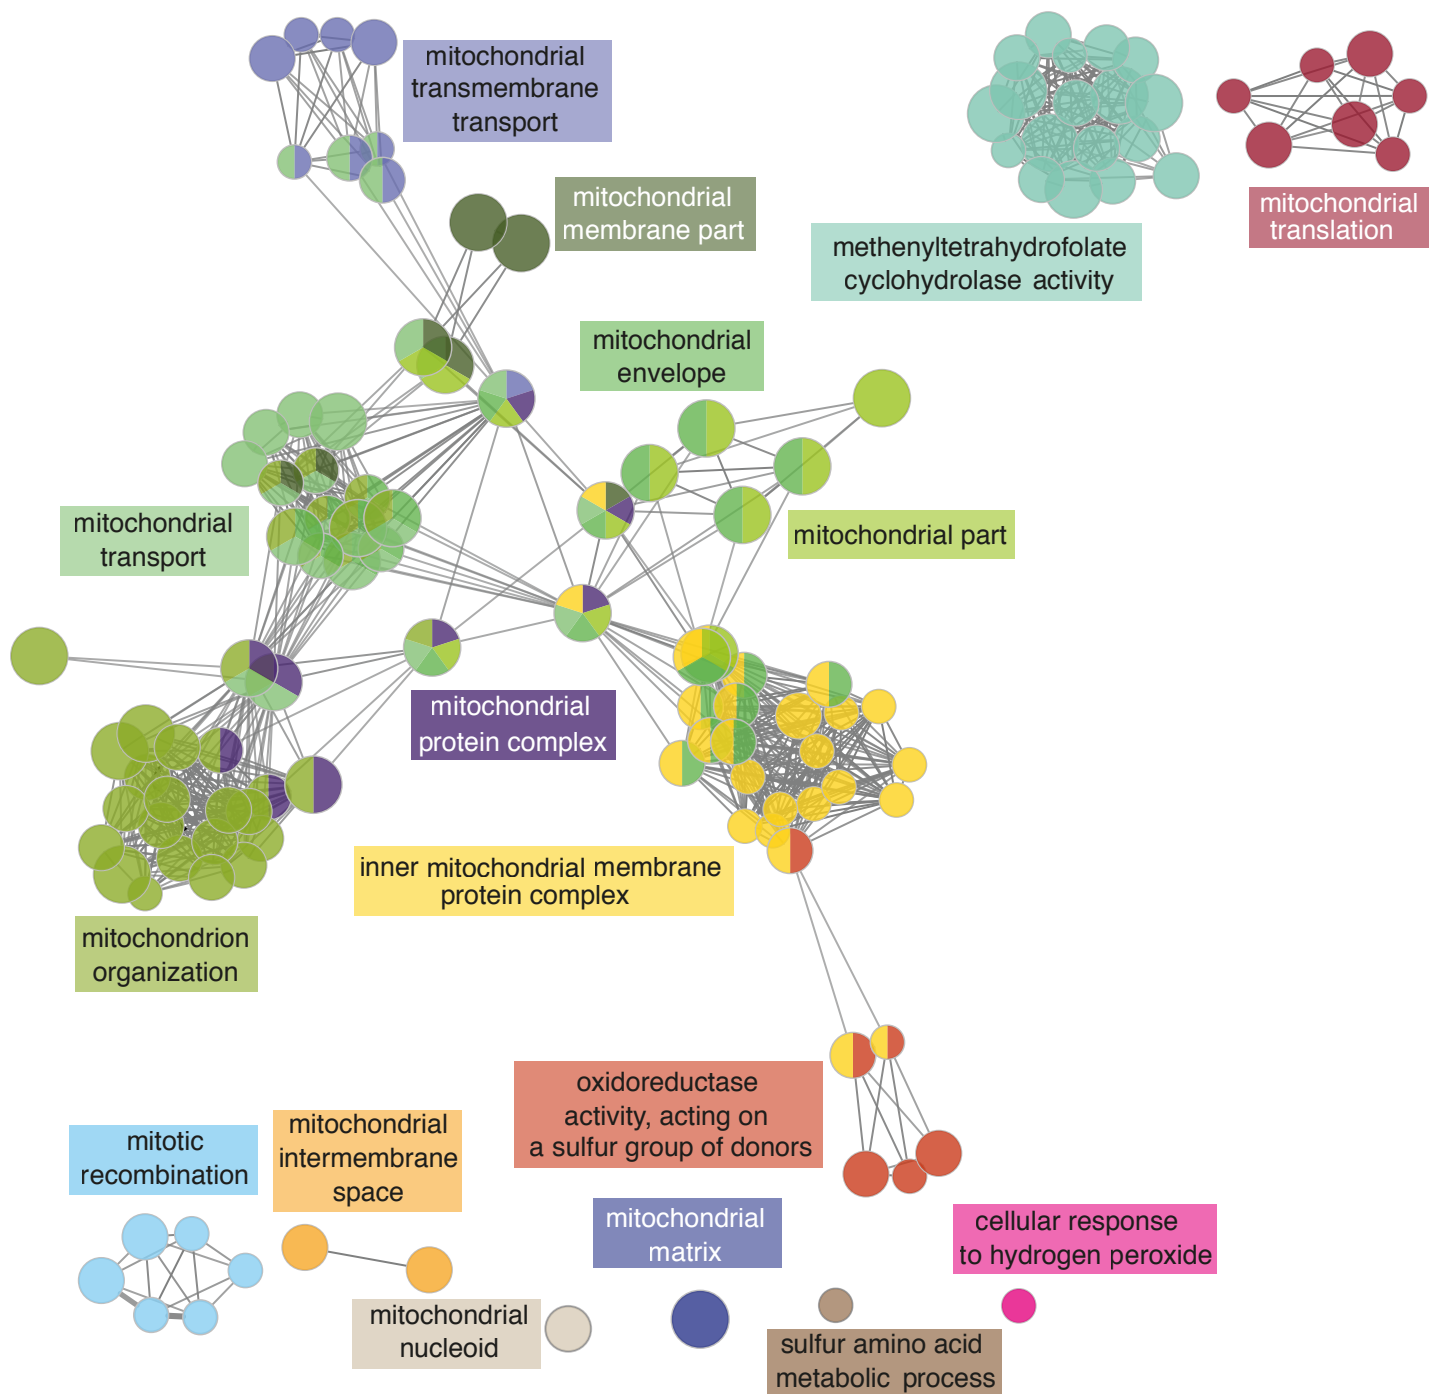

**Figure S7. PD-1 targets different mitochondrial pathways and GO categories.** ClueGo plot of the 84 mitochondrial genes differentially expressed in  $T_{ACT}$  and  $T_{ACT+PD1}$  cells. ClueGO visualizes the selected terms in a functionally grouped annotation network that reflects the relationships between the terms based on the similarity of their associated genes. The size of the nodes reflects the statistical significance of the terms. The group leading term for each cluster is indicated.
